# Supplementary material
Source: publisher site journal article supplement (https://www.dovepress.com/get_supplementary_file.php?f=220462.docx)
Supplement: Supplementary file 1 [file get_supplementary_file.php]

**Supporting Figures**


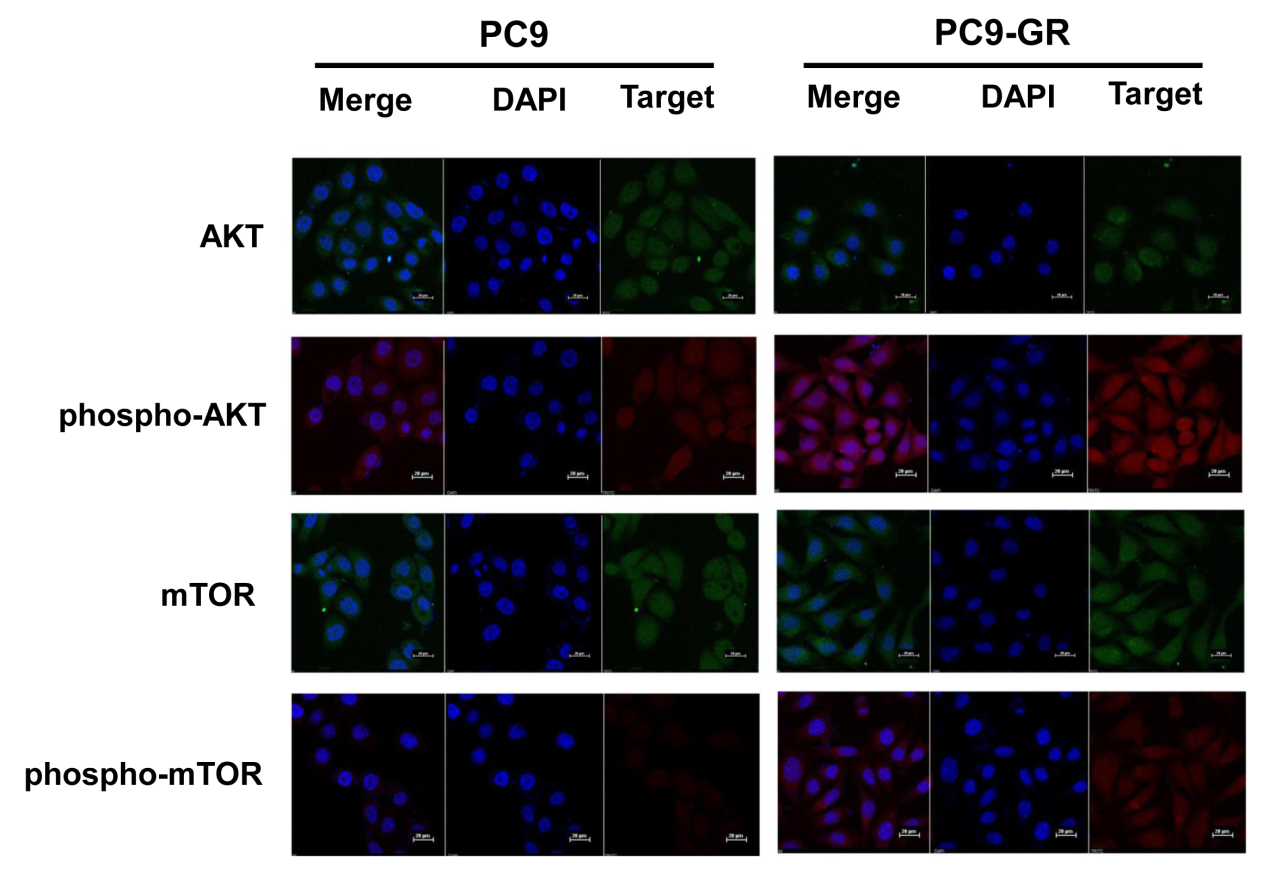


**Figure S1. Immunofluorescence microscopy analysis of PC9 and PC9-GR cells.**


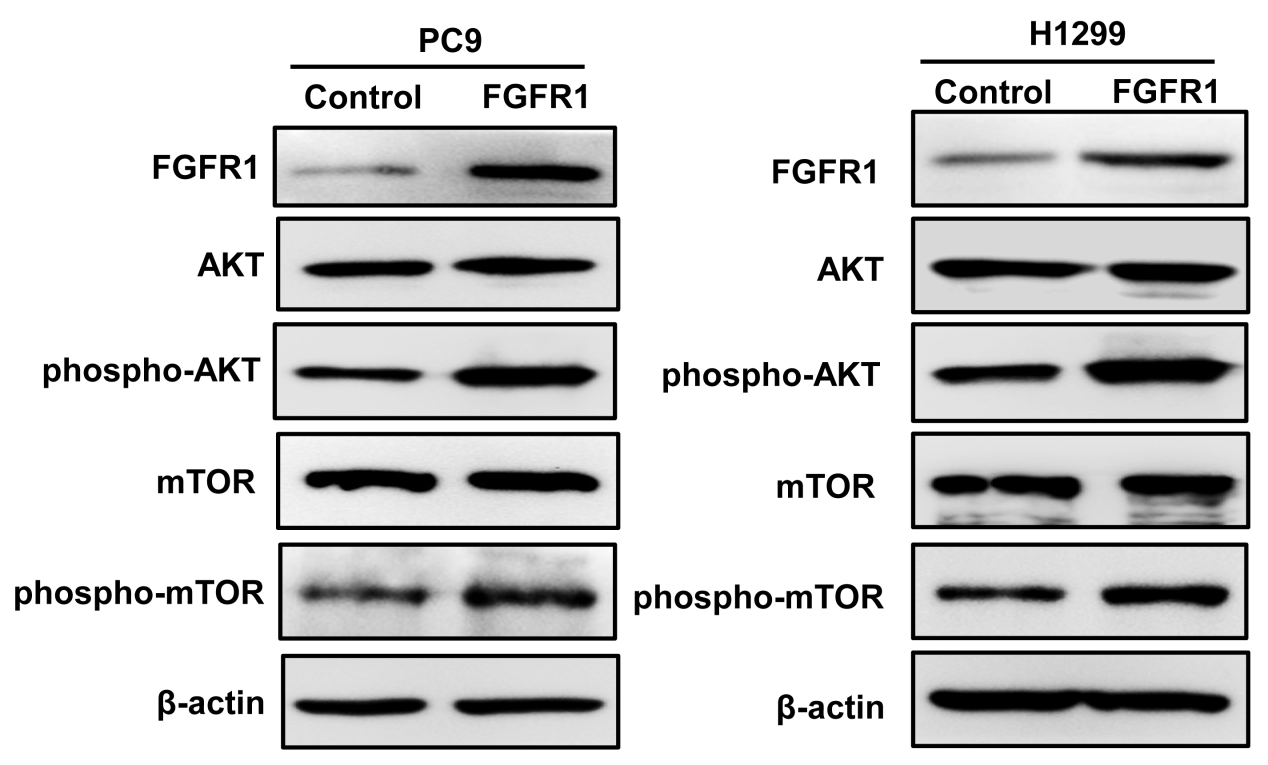


**Figure S2. Western blot analysis of NSCLC cells overexpressed FGFR1.**


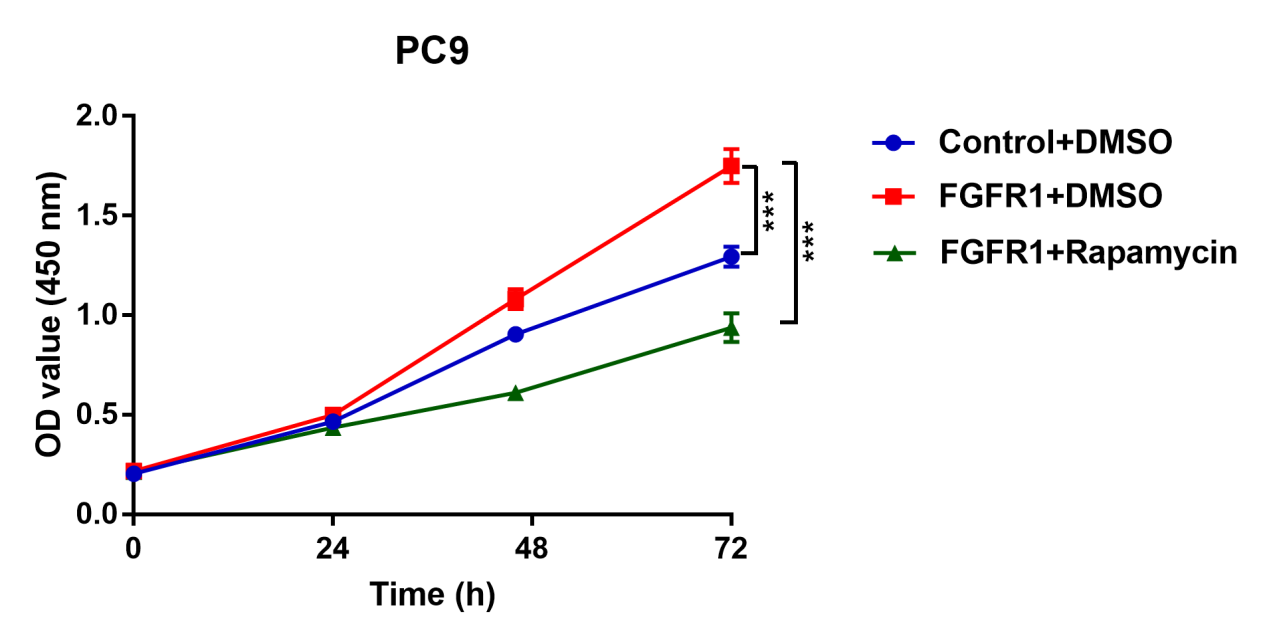


**Figure S3. Rapamycin could counteract the proliferation of PC9 cell induced by FGFR1.**
